# Supplementary material for: Silver nanoparticles from insect wing extract: Biosynthesis and evaluation for antioxidant and antimicrobial potential
Source: PubMed Central journal article supplement (PMC7971846; doi:10.1371/journal.pone.0241729), 2021-03-18
Supplement: pone.0241729.s005.pdf [file pone.0241729.s005.pdf]

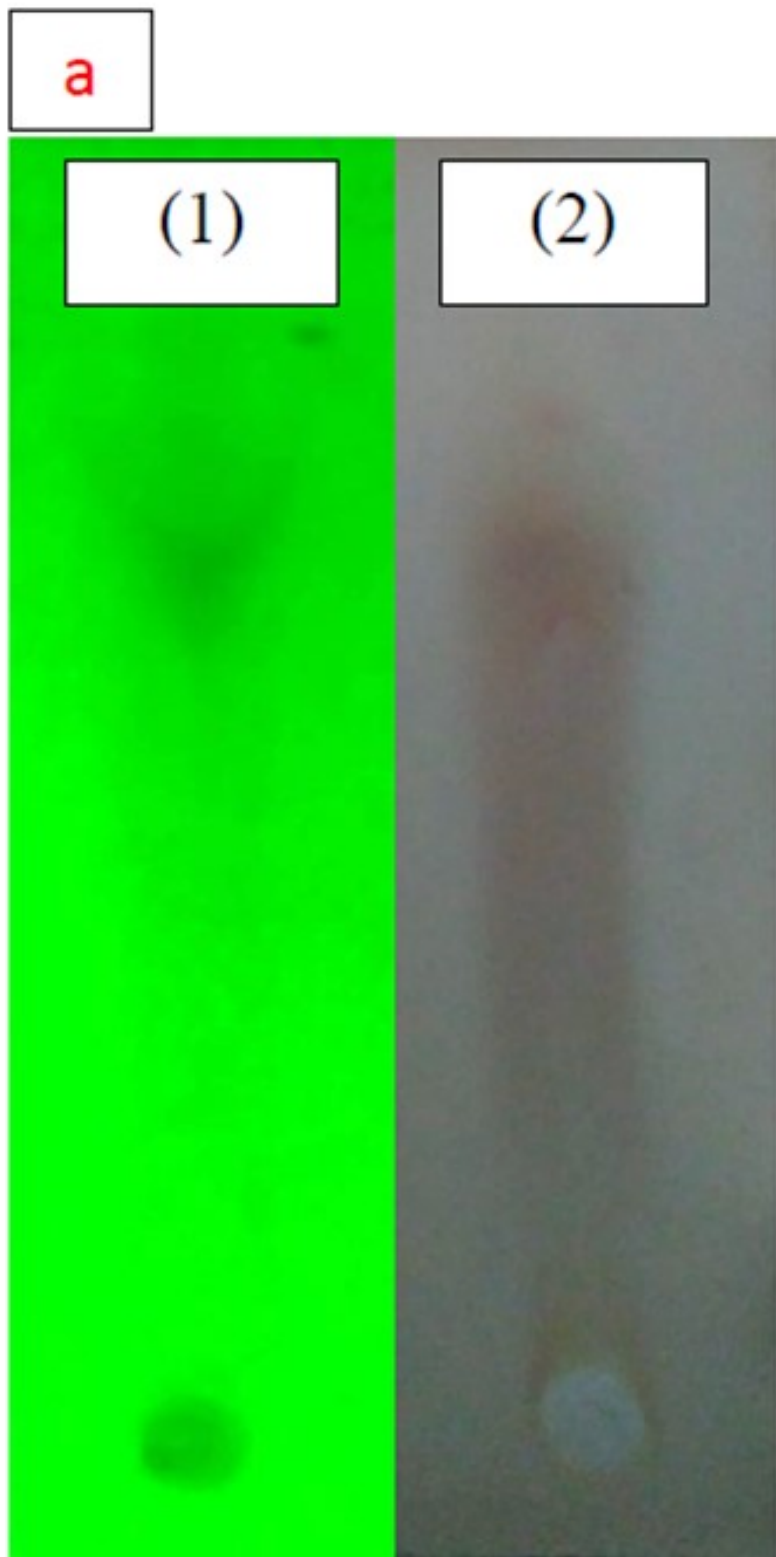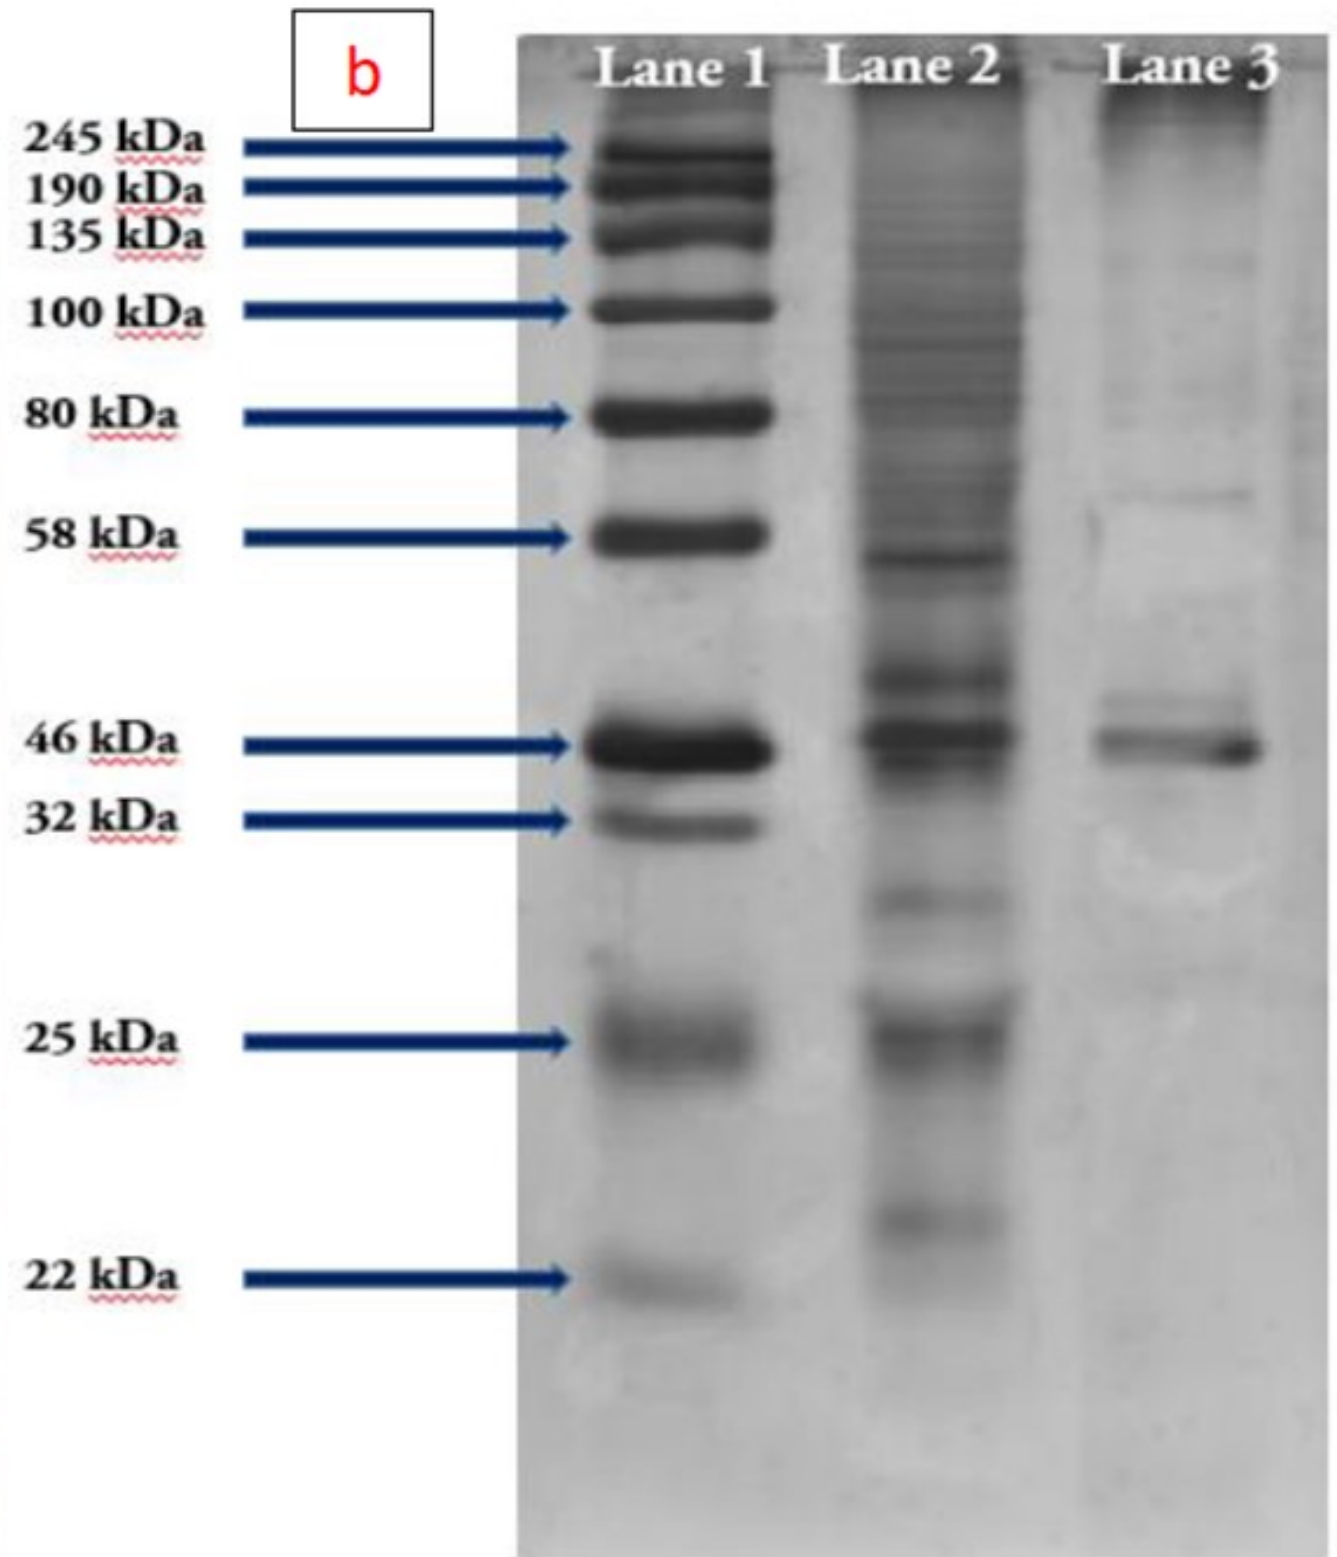

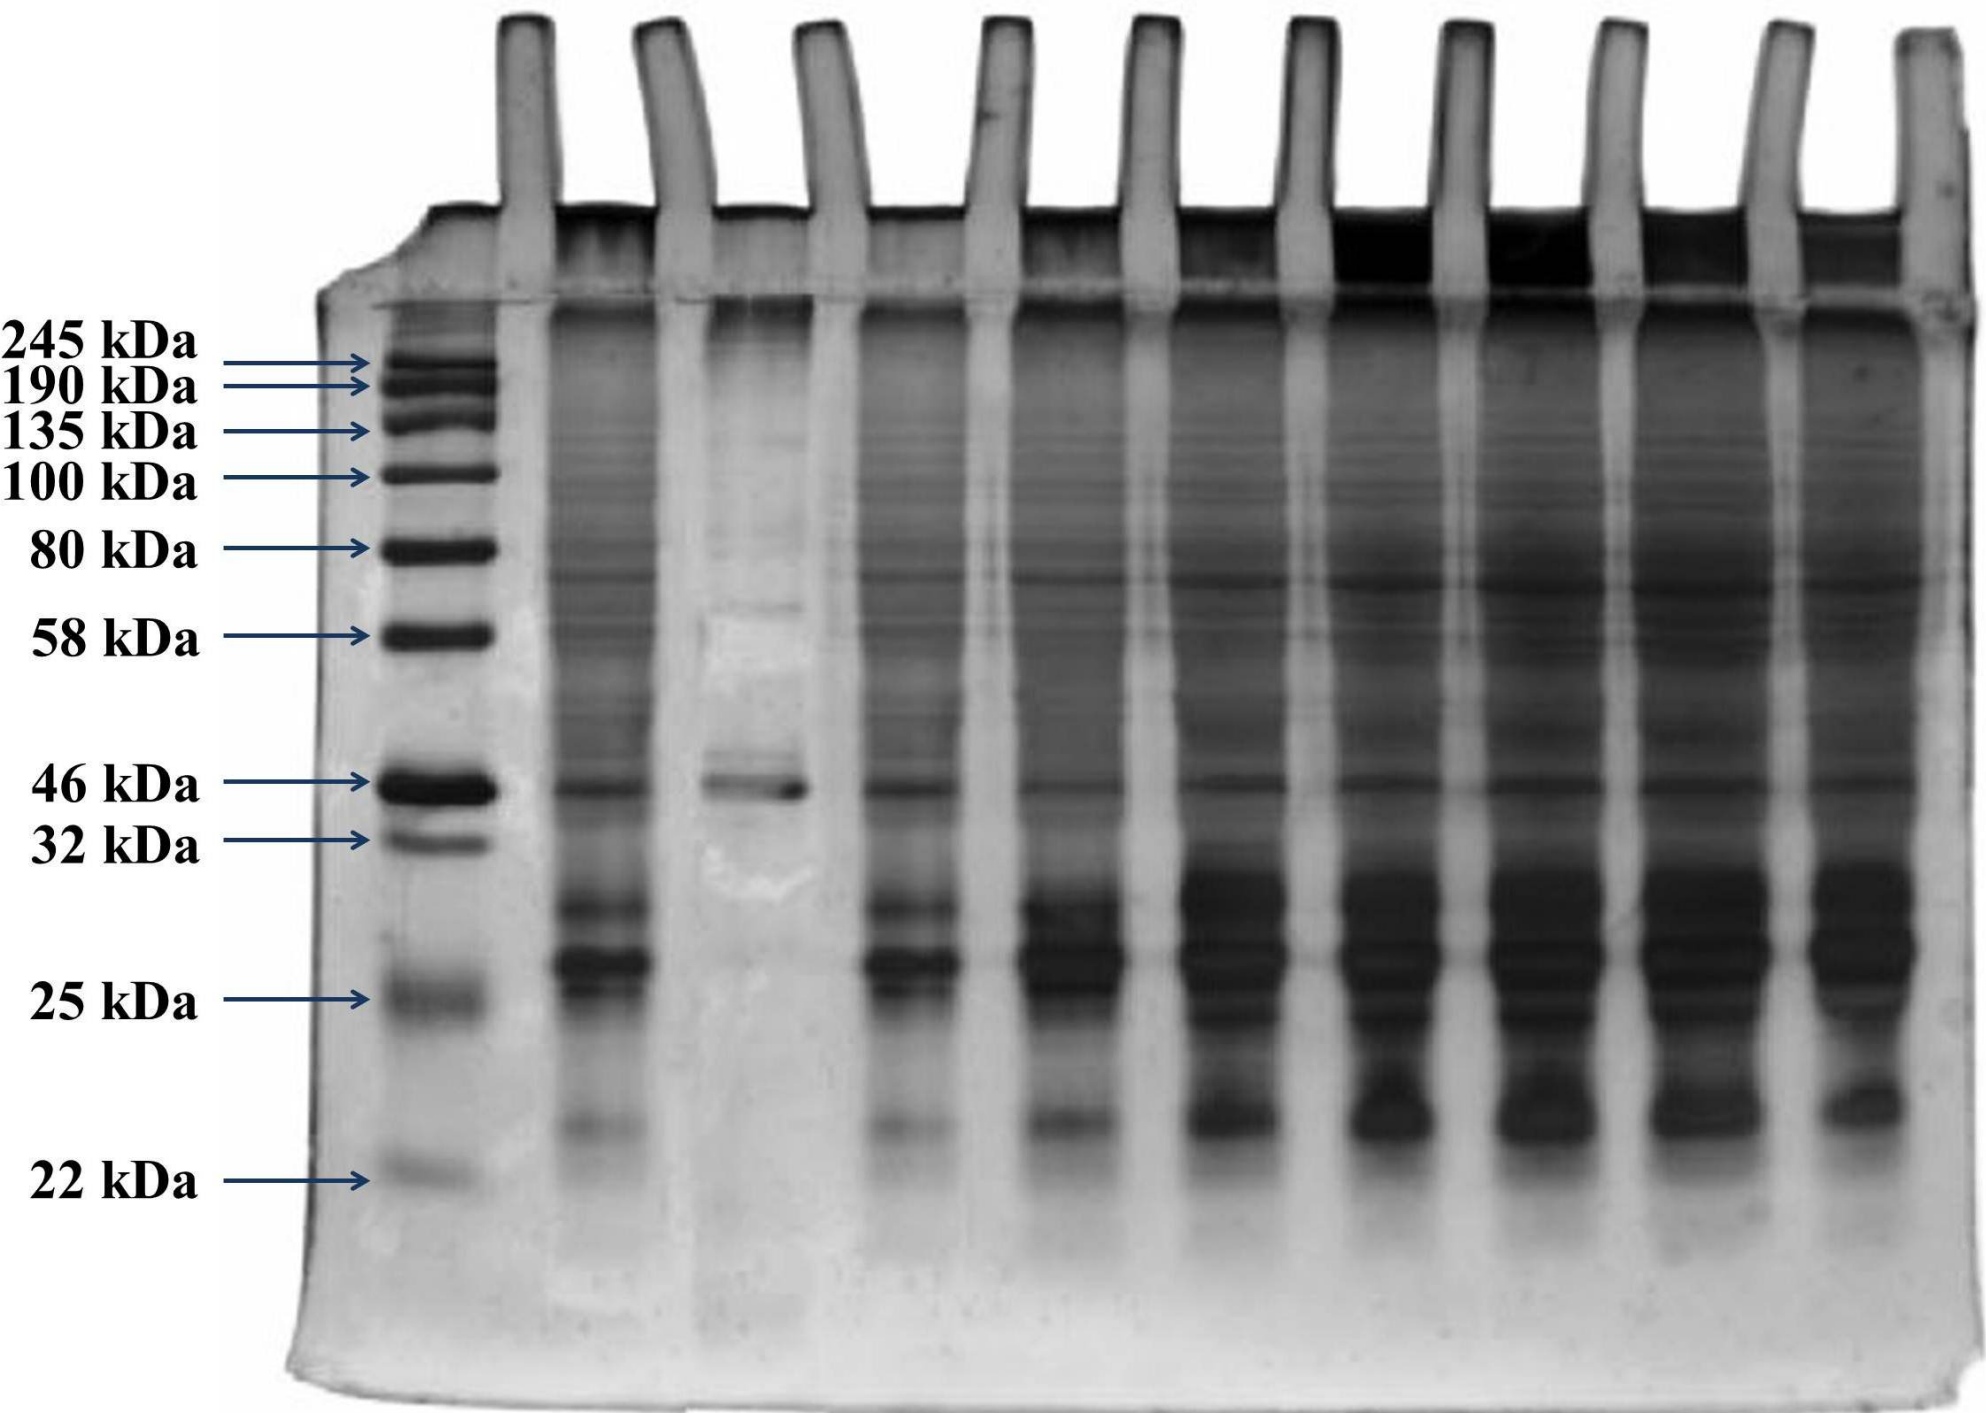

Figure 6(b) SDS-PAGE analysis of *Mang Mao* wings extract protein; Lane 1. Molecular size marker; lane 2. Crude protein; lane 3. Purified protein (46 kDa) responsible for active biosynthesized MMAgNPs
