# Supplementary material for: Silver nanoparticles from insect wing extract: Biosynthesis and evaluation for antioxidant and antimicrobial potential
Source: PubMed Central journal article supplement (PMC7971846; doi:10.1371/journal.pone.0241729), 2021-03-18
Supplement: pone.0241729.s006.pdf [file pone.0241729.s006.pdf]

## Supplementary material:

### Antibacterial activity

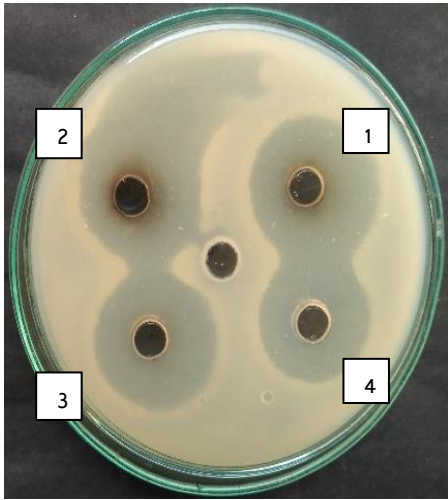

*Staphylococcus aureus* MTCC 96

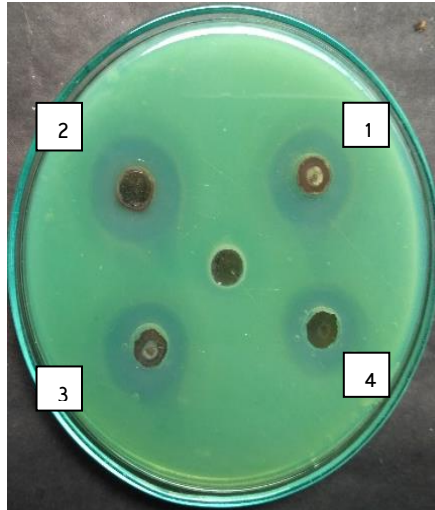

*Pseudomonas aeruginosa* MTCC 424

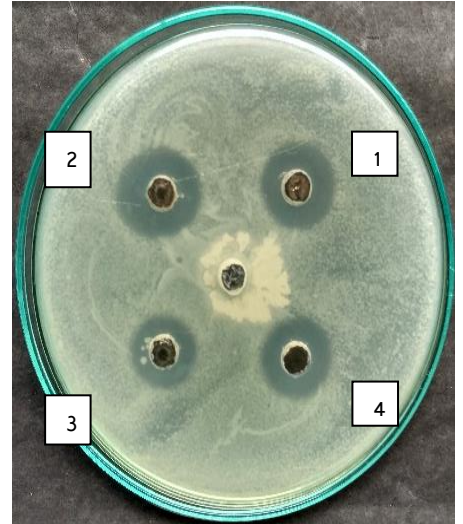

*Escherichia coli* MTCC 43

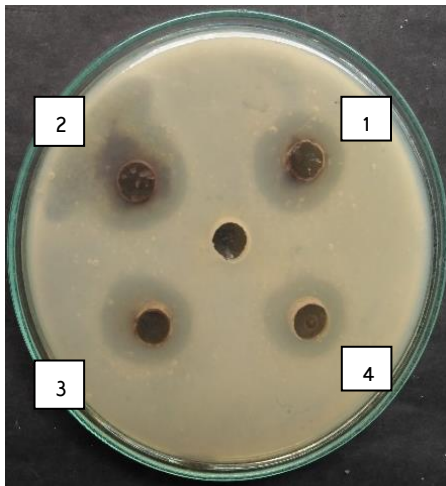

*Klebsiella pneumonia* MTCC 9751

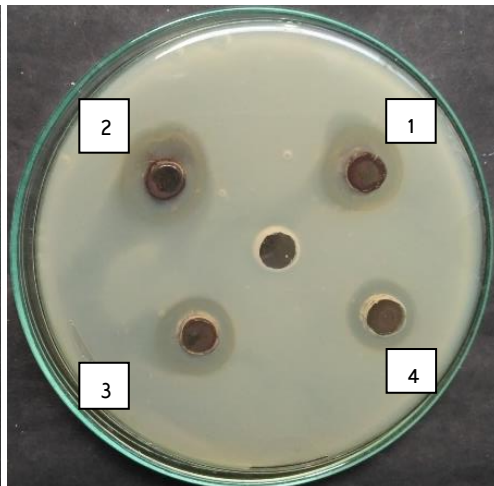

*Achromobacter xylosoxidans* SHB 204

Here : 1= 10 $\mu$ g/ml, 2= 5 $\mu$ g/ml; 3=2.5 $\mu$ g/ml; 4=1.25 $\mu$ g/ml

**Antifungal activity**

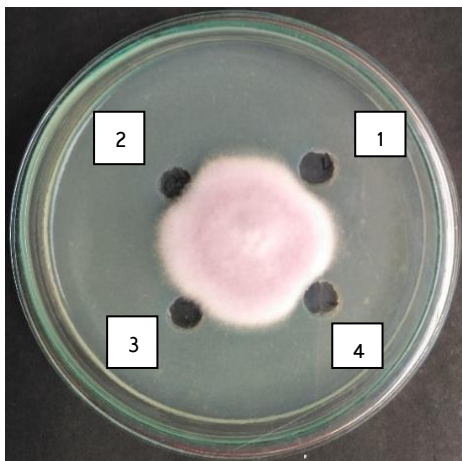

*Fusarium oxysporum*  
*f.sp. ricini*

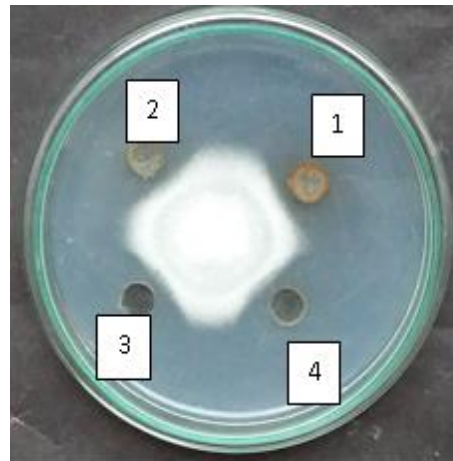

*Fusarium oxysporum*  
*f.sp. lycopersici*

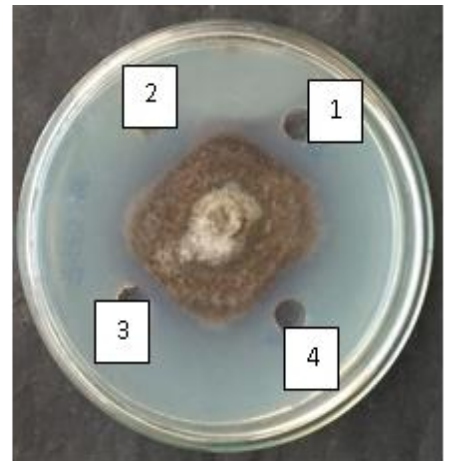

*Phytophthora nicotianae*

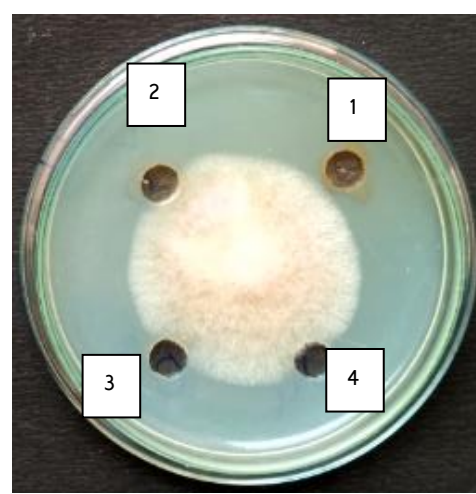

*Fusarium sacchari*

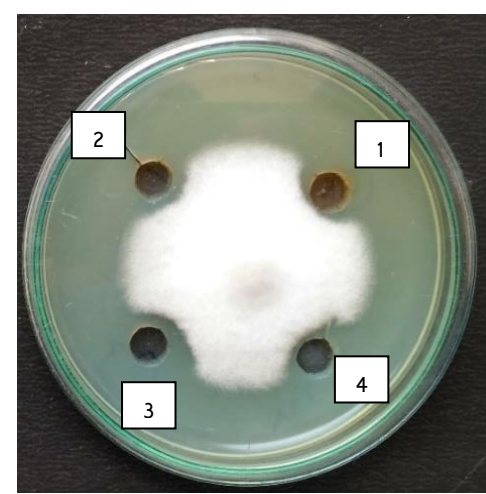

*Colletotrichum falcatum*

**Here : 1= 10µg/ml, 2= 5µg/ml; 3=2.5µg/ml; 4=1.25µg/ml**

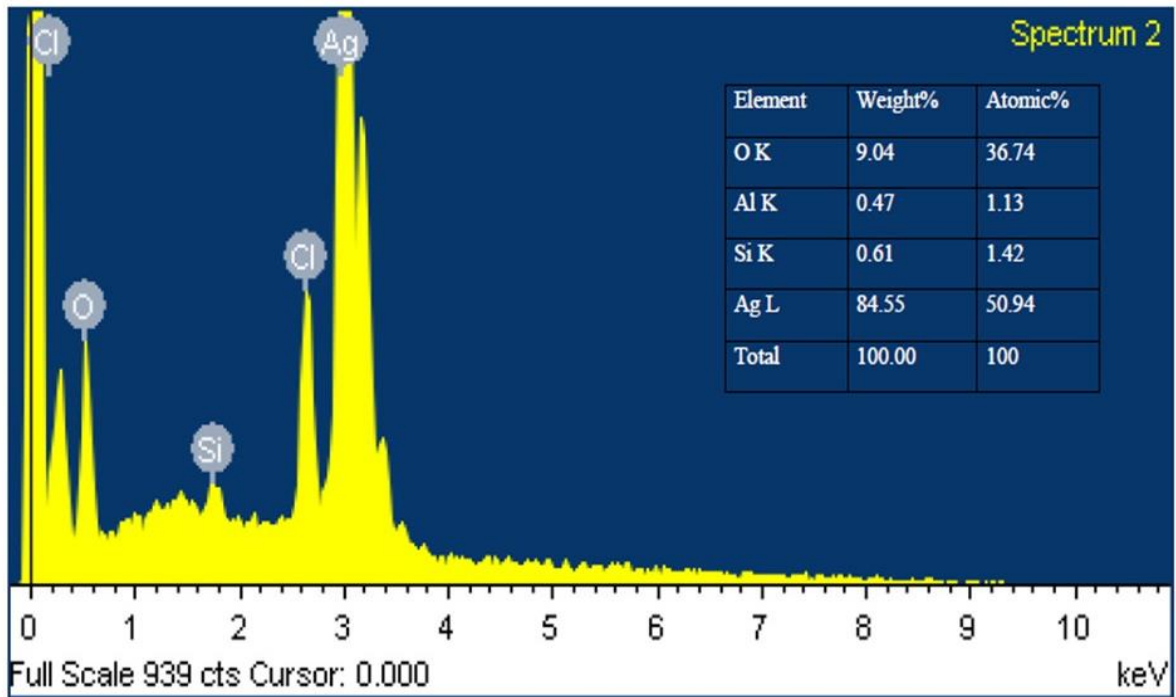

**Figure 4 (a)** Energy dispersive X-ray analysis of the synthesized MMAgNPs.

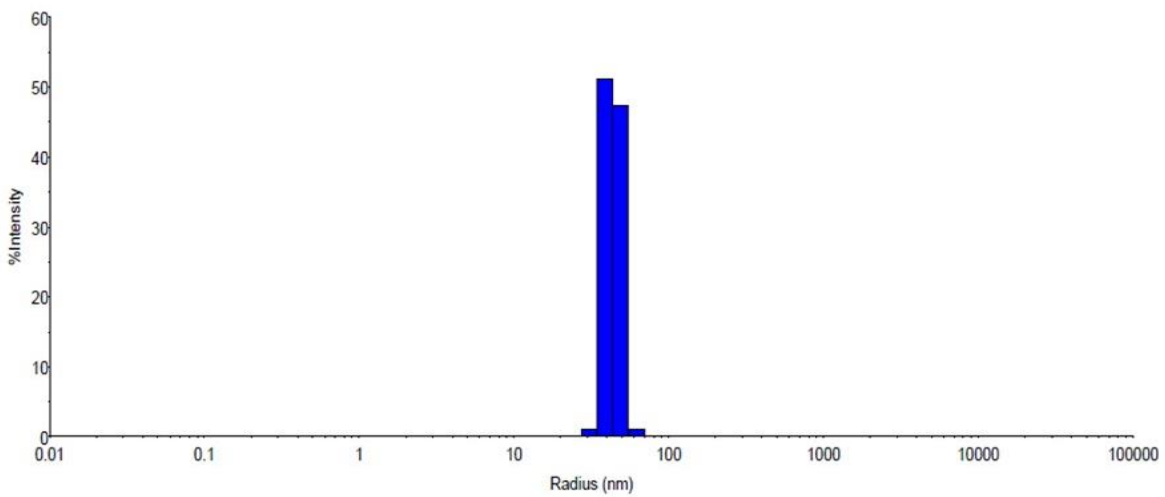

|        | Radius (nm) | Mw-R (kDa) | %Pd  | %Intensity | %Mass | %Number |
|--------|-------------|------------|------|------------|-------|---------|
| Peak 1 | 43.9        | 23461.4    | 12.8 | 100.0      | 100.0 | 100.0   |

**Figure 5** Characterization of MMAgNPs by DLS size distribution

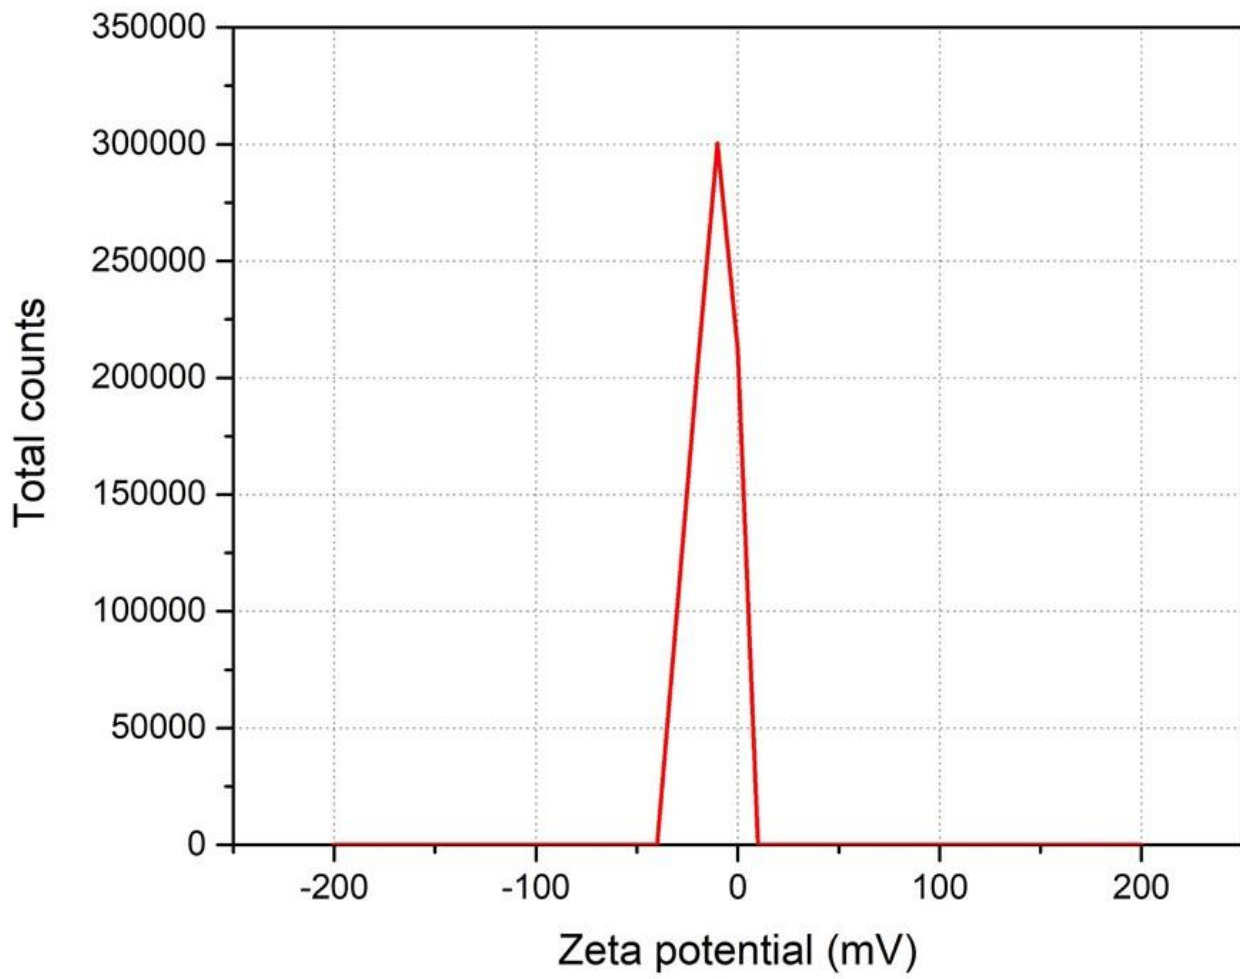

**Figure 5** Characterization of MMAgNPs by zeta potential analysis
